# Supplementary material for: Highly Expressed Progesterone Receptor B Isoform Increases Platinum Sensitivity and Survival of Ovarian High-Grade Serous Carcinoma
Source: MDPI journal article supplement (doi:10.3390/cancers13215578), 2021-11-08

# Highly Expressed Progesterone Receptor B Isoform Increases Platinum Sensitivity and Survival of Ovarian High-Grade Serous Carcinoma

Hao Lin, Kuo-Chung Lan, Yu-Che Ou, Chen-Hsuan Wu, Hong-Yo Kang, I-Chieh Chuang and Hung-Chun Fu

**Table S1.** Univariate and multivariate Cox regression analysis of the risk factors for progression-free survival.

| Variable              | Univariate Analysis |             |                | Multivariate Analysis |             |                |
|-----------------------|---------------------|-------------|----------------|-----------------------|-------------|----------------|
|                       | HR                  | 95% C.I.    | <i>p</i> value | HR                    | 95% C.I.    | <i>p</i> value |
| Age ≥ 60              | 1.18                | 0.71 – 1.97 | 0.529          |                       |             |                |
| Menopause             | 1.14                | 0.69 – 1.89 | 0.611          |                       |             |                |
| Stage III, IV         | 3.17                | 1.37 – 7.36 | 0.007          | 1.99                  | 0.82 – 4.83 | 0.129          |
| Sub-optimal debulking | 2.73                | 1.65 – 4.49 | <0.001         | 2.2                   | 1.31 – 3.70 | 0.003          |
| CA125 ≥ 500 U/mL      | 1.72                | 1.05 – 2.82 | 0.032          | 1.35                  | 0.81 – 2.26 | 0.244          |
| PR-B score < 12.5     | 1.95                | 1.09 – 3.49 | 0.024          | 1.79                  | 0.99 – 3.22 | 0.052          |

Abbreviations: CA-125: carbohydrate antigen-125, C.I.: confidence interval, HR: hazard ratio, PR-B: progesterone receptor-B.

**Table S2.** Univariate and multivariate Cox regression analysis of the risk factors for cancer-specific survival.

| Variable              | Univariate Analysis |             |                | Multivariate Analysis |             |                |
|-----------------------|---------------------|-------------|----------------|-----------------------|-------------|----------------|
|                       | HR                  | 95% C.I.    | <i>p</i> value | HR                    | 95% C.I.    | <i>p</i> value |
| Age ≥ 60              | 1.94                | 1.06 – 3.57 | 0.032          | 2.12                  | 0.96 – 4.69 | 0.061          |
| Menopause             | 1.31                | 0.69 – 2.49 | 0.407          |                       |             |                |
| Stage III, IV         | 1.71                | 0.72 – 4.06 | 0.222          |                       |             |                |
| Sub-optimal debulking | 2.71                | 1.46 – 5.03 | 0.002          | 2.45                  | 1.26 – 4.77 | 0.008          |
| CA125 ≥ 500 U/mL      | 1.82                | 0.98 – 3.38 | 0.059          |                       |             |                |
| PR-B score < 12.5     | 2.15                | 0.99 – 4.65 | 0.051          |                       |             |                |

Abbreviations: CA-125: carbohydrate antigen-125, C.I.: confidence interval, HR: hazard ratio, PR-B: progesterone receptor-B.

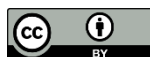

Supplement: s1 [file s1]
